# Supplementary material for: α2-Adrenergic blockade rescues hypoglossal motor defense against obstructive sleep apnea
Source: JCI journal article supplement (doi:10.1172/jci.insight.91456), 2017-02-16
Supplement: sd1 [file 1]

## SUPPLEMENTARY FIGURES

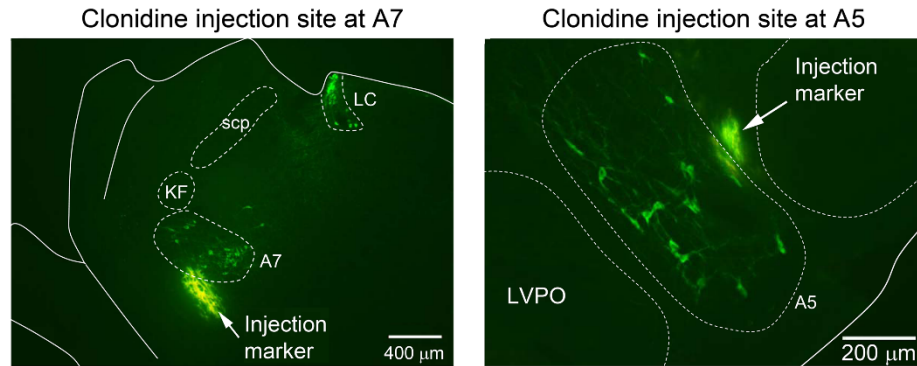

**Fig. S1.** Microinjection loci of clonidine or yohimbine were marked by subsequent microinjection of fluorescent microspheres. Noradrenergic neurons in the A7 or A5 regions were revealed using anti-TH (tyrosine hydroxylase) immunostaining. KF, Kölliker-Fuse nucleus; LVPO, lateroventral periolivary nucleus; scp, superior cerebellum peduncle.

## SUPPLEMENTARY TABLE

**Table S1.** Comparison of the potency and off-target profiles of  $\alpha_2$ -adrenergic blockers (yohimbine and mirtazapine) for treatment of obstructive sleep apnea compared to commonly used  $\beta_1$ -adrenergic blockers (propranolol and metoprolol) for treatment of hypertension and heart diseases.

| Receptor                                                      | Yohimbine (Ki) | Mirtazapine | Propranolol (Ki) | Metoprolol (Ki) |
|---------------------------------------------------------------|----------------|-------------|------------------|-----------------|
| $\alpha_1$                                                    | >500           | 371         | n/a              | n/a             |
| $\alpha_{2a}$                                                 | <b>0.5</b>     | <b>20</b>   | > 1,000          | n/a             |
| $\alpha_{2b}$                                                 | 1.0            | n/a         | > 1,000          | n/a             |
| $\alpha_{2c}$                                                 | <b>0.18</b>    | <b>18</b>   | > 1,000          | n/a             |
| $\beta_1$                                                     | n/a            | n/a         | <b>1.35</b>      | <b>63</b>       |
| $\beta_2$                                                     | n/a            | n/a         | 0.33             | 1698            |
| 5-HT <sub>1A</sub>                                            | 346            | 18          | 331              | n/a             |
| 5-HT <sub>1B</sub>                                            | 19.9           | n/a         | 85               | >10,000         |
| 5-HT <sub>2A</sub>                                            | 966            | 2           | 1516             | n/a             |
| 5-HT <sub>2C</sub>                                            | 1000           | 24          | 574              | n/a             |
| 5-HT <sub>3</sub>                                             | 1000           | n/a         | 4000             | n/a             |
| H <sub>1</sub>                                                | n/a            | 0.5         | n/a              | n/a             |
| D <sub>1</sub>                                                | >10,000        | 4167        | >10,000          | n/a             |
| D <sub>2</sub>                                                | 398            | 1460        | >10,000          | n/a             |
| D <sub>3</sub>                                                | 2489           | 20          | n/a              | n/a             |
| Source: PDSP Ki Database, National Institute of Mental Health |                |             |                  |                 |
